# Supplementary material for: A novel composite photocatalyst based on in situ growth of ultrathin tungsten oxide nanowires on graphene oxide sheets
Source: Royal Society of Chemistry journal article supplement (doi:10.1039/c3ra41109e), 2013-01-01
Supplement: c3ra41109e.pdf [file c3ra41109e.pdf]

## Electronic Supplementary Information

### **Novel composite photocatalyst based on *in situ* growth of ultrathin tungsten oxide nanowires on graphene oxide sheets**

Xueting Chang<sup>1</sup>, Lihua Dong<sup>1</sup>, Yansheng Yin<sup>1</sup>, Shibin Sun<sup>2\*</sup>

<sup>1</sup> *Institute of Marine Materials Science and Engineering, Shanghai Maritime University, Shanghai 201306, China*

<sup>2</sup> *Logistics Engineering College, Shanghai Maritime University, Shanghai 201306, China*

#### **Supporting Table**

Table S1 Percentages of different bindings calculated from the deconvoluted XPS spectra of C 1s peak.

| Binding | GO           | W <sub>18</sub> O <sub>49</sub> -rGO |
|---------|--------------|--------------------------------------|
| C-C     | <b>39.5%</b> | <b>60.9%</b>                         |
| C-O     | <b>45.5%</b> | <b>26.4%</b>                         |
| C=O     | <b>11.8%</b> | <b>7%</b>                            |
| COOH    | <b>3.2%</b>  | <b>5.7%</b>                          |

\* Corresponding author. E-mail: sunshibin1982@yahoo.com.cn

## Supporting Figures

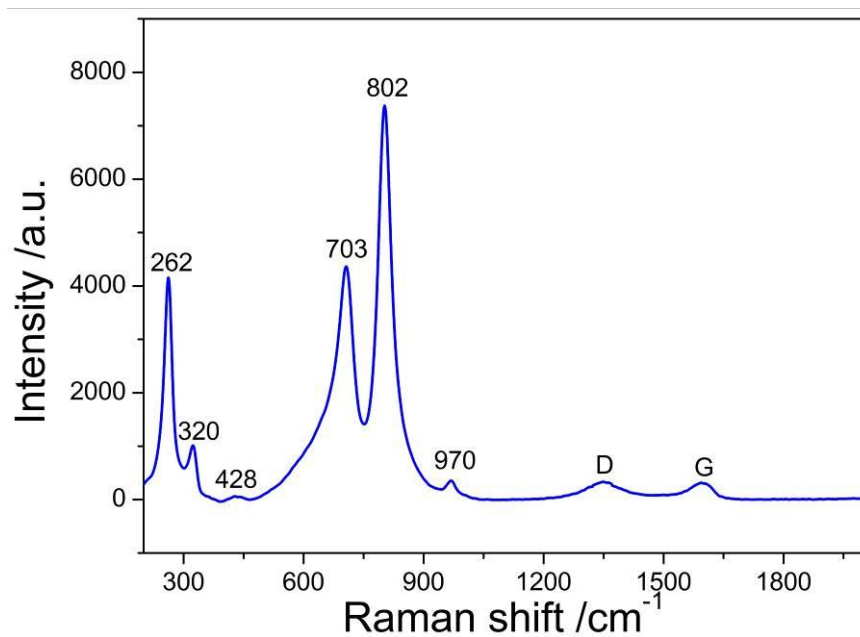

Figure S1 Raman spectrum of  $W_{18}O_{49}$ -GO composite.

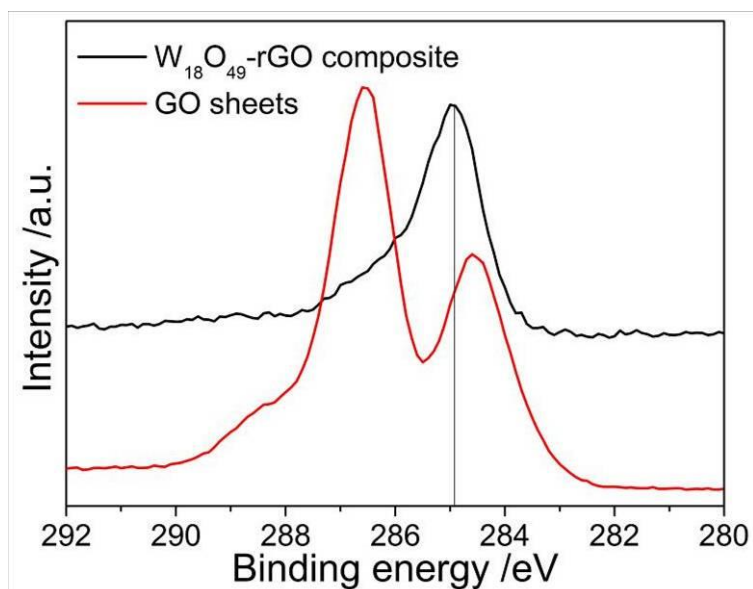

Figure S2 Comparison of core-level spectra of C 1s for GO sheets and  $W_{18}O_{49}$ -GO composite.

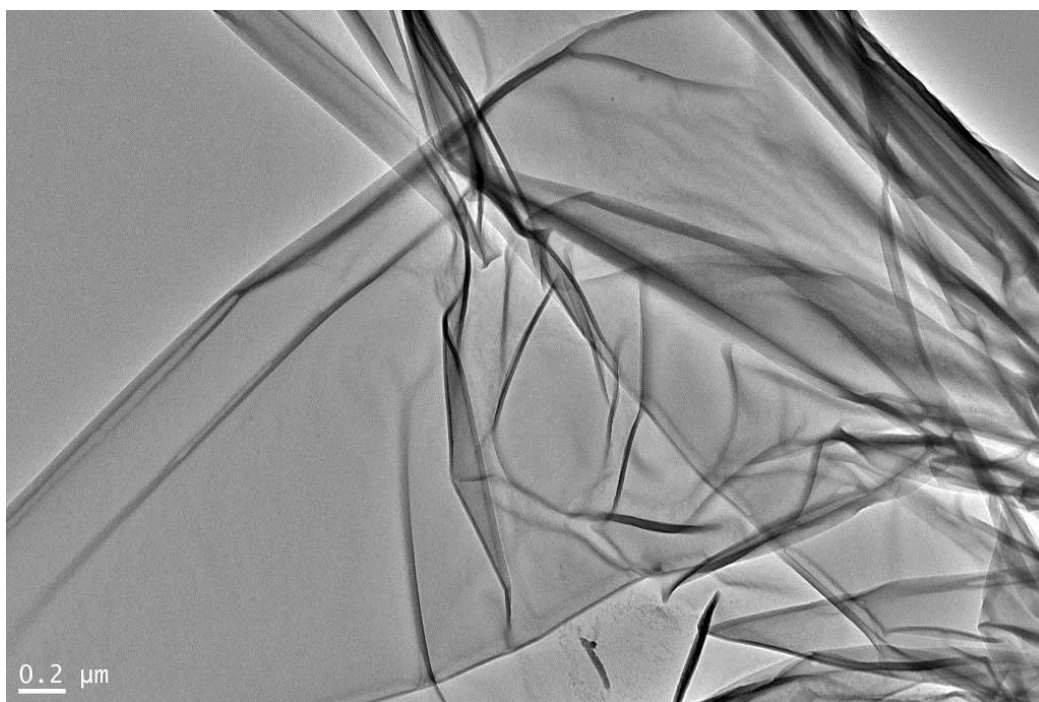

Figure S3 TEM image of GO sheets.

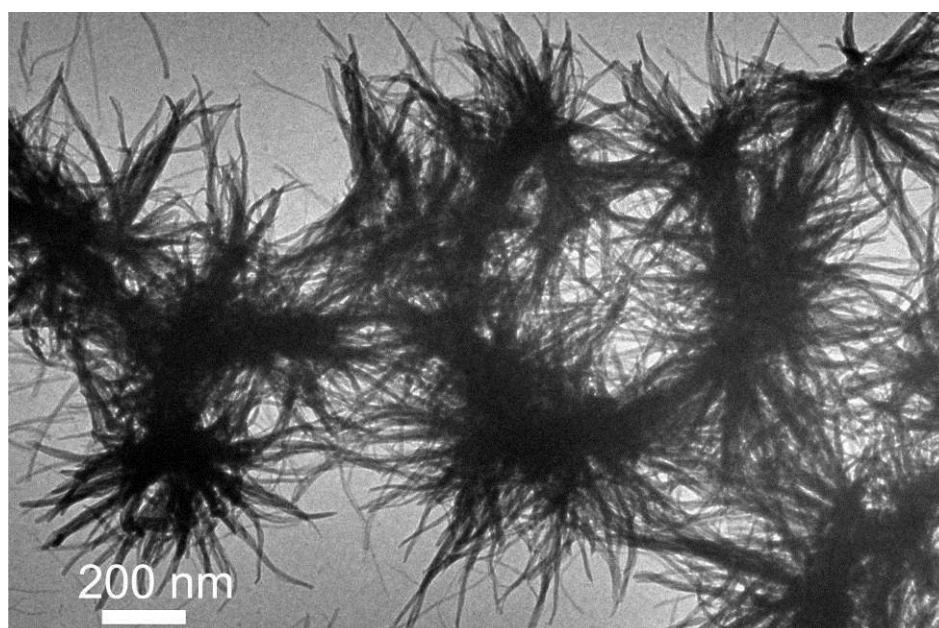

Figure S4 TEM image of  $W_{18}O_{49}$  nanoflowers prepared in the absence of GO sheets.

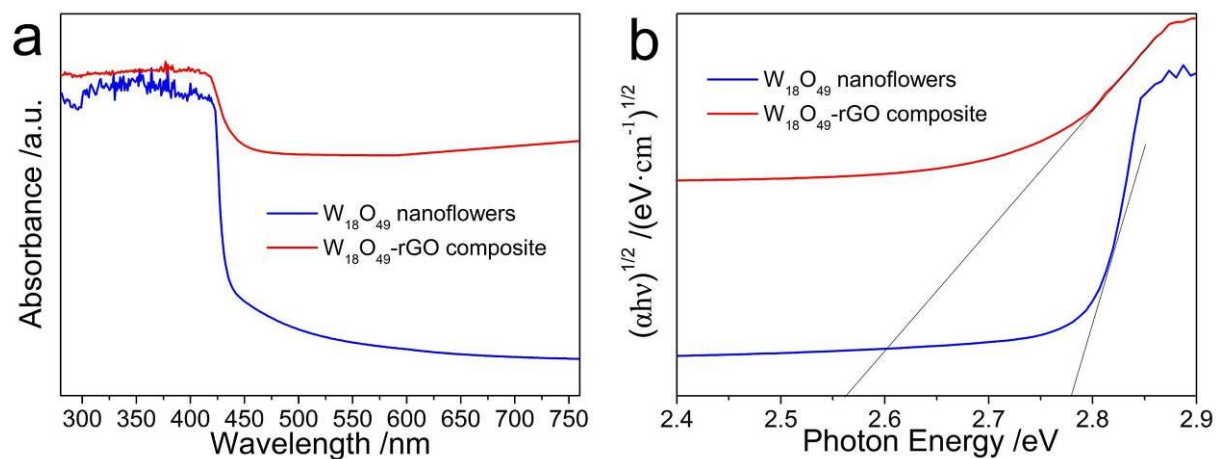

**Fig. S5** (a) UV-vis adsorption spectra and (b) plots of  $(\alpha h\nu)^{1/2}$  vs  $h\nu$  of W<sub>18</sub>O<sub>49</sub> nanoflowers and W<sub>18</sub>O<sub>49</sub>-rGO composite. From the linear extrapolation of the plots of  $(\alpha h\nu)^{1/2}$  vs  $h\nu$ , the bandgaps of the W<sub>18</sub>O<sub>49</sub> nanoflowers and the W<sub>18</sub>O<sub>49</sub>-rGO composite were measured to be 2.78 and 2.56 eV, respectively.
